# Supplementary material for: Identifying Temporally Regulated Root Nodulation Biomarkers Using Time Series Gene Co-Expression Network Analysis
Source: Front Plant Sci. 2019 Oct 31;10:1409. doi: 10.3389/fpls.2019.01409 (PMC6836625; doi:10.3389/fpls.2019.01409)
Supplement: Supplementary file 3 [file Table_1.xlsx]

## Sheet: S1
Gene ID	primer 5'-3'
Medtr4g074960-F	TGCATTTCTTTTAGCCGTTTACTC
Medtr4g074960-R	AGCTCATATCCTCCGGGTTTTTAC
Medtr4g109880-F	AGGCTTATCAACTTCTCC
Medtr4g109880-R	TATTGCAGCACCCTTTTCAT
Medtr3g070860-F	CAACAAATGGCCTGCTTCTCC
Medtr3g070860-R	TCCTATCTCTTCACCCCCAAATG
Medtr2g027300-F	GCACCGGCGTATTGTTCAGTA
Medtr2g027300-R	CACCAAAGCAATCCAAATAATCAT
Medtr5g064530-F	GCCTACCATCCCTTCAGTGC
Medtr5g064530-R	AAGGGATGGAGGAGATAATGGTT
Medtr2g062600-F	GCAACTGCATCAAATCCACT
Medtr2g062600-R	TCCCACTTCCAAGCCTCAAT
MtPI4K-F	GCAGATAGACACGCTGGGA
MtPI4K-R	AACTCTTGGGCAGGCAATAA
